# Supplementary material for: Artificial Rearing of Atlantic Salmon Juveniles for Supportive Breeding Programs Induces Long-Term Effects on Gut Microbiota after Stocking
Source: MDPI journal article supplement (doi:10.3390/microorganisms9091932), 2021-09-11
Supplement: s1 [file s1]

## **Supplementary materials**

### **1. Genotyping protocol**

#### **a. Modifications for DNA extraction protocol from Aljanabi and Martinez 1997:**

After the overnight incubation, 20  $\mu$ L of Proteinase K was added and incubated for at least 2 hours at 50 °C before adding 4  $\mu$ L of Rnase A (10 mg/L) for an incubation of one hour at room temperature. After adding the Isopropanol, the samples were incubated at -20 °C between one to 12 hours. The pellets were rinsed twice with cold 70 % ethanol, dried at 60 °C for 1 to 2 hours or at 37 °C overnight and resuspended in 100  $\mu$ L sterile H<sub>2</sub>O.

#### **b. Microsatellites loci amplification protocol (Multiplex)**

The Multiplex PCR kit (Qiagen, Product number 206145) were used to amplify the 17 chosen loci under three PCR reactions. For each PCR reactions, a volume of primers was added in order to obtain a final volume of 10  $\mu$ L for the reaction. Primers quantity and PCR conditions for each reaction are described below and PCR conditions were the following: 95°C for 15 min (95°C for 30 sec; 58°C for 3 min; 72°C for 1 min)<sup>35</sup> 72°C for 30 min.

**Tab. S1.** Primers (reverse and forward) used for the microsatellites amplification protocol (total volume of 10  $\mu$ L) and their respective quantity in  $\mu$ L for one reaction.

| <b>Reagent</b>         | <b>Volume (<math>\mu</math>L)</b> |
|------------------------|-----------------------------------|
| <b>PCR Multiplex 1</b> |                                   |
| Multiplex PCR kit      | 5                                 |
| Ssa171 primer          | 0.2                               |
| Ssa197 primer          | 0.05                              |
| Ssa202 primer          | 0.3                               |
| Ssa1417 primer         | 0.15                              |
| SsaD85 primer          | 0.4                               |
| SsaD71 primer          | 0.4                               |
| DNA                    | 2                                 |
| <b>PCR Multiplex 2</b> |                                   |
| Multiplex PCR kit      | 5                                 |
| SsaD144 primer         | 0.6                               |
| Sssp1605 primer        | 0.5                               |
| Sssp2210 primer        | 0.1                               |
| Sssp2215 primer        | 0.25                              |
| Sssp2216 primer        | 0.05                              |
| DNA                    | 2                                 |
| <b>PCR Multiplex 3</b> |                                   |
| Multiplex PCR kit      | 5                                 |
| Sssp2201 primer        | 0.9                               |
| SsspG7 primer          | 0.1                               |
| MST-3 primer           | 0.25                              |
| SsaD58 primer          | 0.8                               |
| Ssa85 primer           | 0.03                              |
| SsaD486 primer         | 0.025                             |
| DNA                    | 2                                 |

### c. DNA migrations

For each sample, 1 µL of the Multiplex PCR product was diluted in 10 µL H<sub>2</sub>O. Then, 2 µL of the dilution was mixed with 10 µL of a mix of 10 µL Formamide HiDi and 0.13 of GeneScan 500 LIZ (for Multiplex PCR 3, the product was GeneScan 500 ROX).

#### Modification for DNA extraction protocol from Aljanabi and Martinez for microbiota:

The protocol included a one-hour incubation at 37°C with 20 µL lysozyme (25 mg/mL) prior to the overnight incubation. In order to minimize the contamination with RNA, an additional incubation step with 4 µL Rnase A (10 mg/mL) for one hour at 37°C was performed at the end of the incubation process. A 300 µL volume of 6M NaCl solution was added to each sample and samples were vortexed and centrifuged at 4°C, 16 000g for 20 minutes. Supernatant were transferred, and another centrifugation was performed. An equal volume of cold isopropanol (stored at -20 °C) was added to the supernatant, mixed by inversion, and tubes were incubated for at least 30 minutes at -20 °C before being centrifuged for 20 minutes at 4°C, 16 000g. The pellet was washed with cold 70% ethanol (stored at -20 °C), dried and resuspended in 50-200 µL sterile milli-Q water. DNA concentration and quality were estimated by spectrophotometry (NanoDrop 2000, ThermoFisher Scientific).

**Tab. S2.** Used reagents (New England BioLabs) for PCR1 and PCR2 (total volume 50 µL) and their respective quantity in µL for processing one sample. Primers sequences: 519-F 5'-ACA CTC TTT CCC TAC ACG ACG CTC TTC CGA TCT CAG CMG CCG CGG TAA -3', 745-R 5'- GTG ACT GGA GTT CAG ACG TGT GCT CTT CCG ATC TGA CTA CHV GGG TAT CTA ATCC -3'.

| Reagent                               | Quantity (µL) |      |
|---------------------------------------|---------------|------|
|                                       | PCR 1         | PCR2 |
| Q5 Buffer                             | 10            | 10   |
| dNTPs                                 | 1             | 1    |
| 519-F (10 µM)                         | 2.5           | -    |
| 745-R (10 µM)                         | 2.5           | -    |
| Forward Primer, predetermined (10 µM) | -             | 1    |
| Reverse Primer (markers) (10 µM)      | -             | 1    |
| «High GC enhancer»                    | 10            | 10   |
| DNA                                   | 2             | 2    |
| Q5 Polymerase (New England Biolabs)   | 1             | 1    |
| Sterile water                         | 21            | 24   |

**Tab. S3.** DNA amplification conditions for PCR1 and PCR2. The « Denaturation », « Hybridation » and « Elongation » steps were performed 35 times for PCR1 and 12 times for PCR2.

| Step                 | Temperature (°C) | Duration |
|----------------------|------------------|----------|
| Initial Denaturation | 98               | 2 min.   |
| Denaturation         | 98               | 10 sec.  |
| Hybridation          | 60               | 30 sec.  |
| Elongation           | 72               | 30 sec.  |
| Final Elongation     | 72               | 10 min.  |

**Tab. S4.** Used reagents (Qiagen) for COI amplification (total volume 31µL) and their respective quantity in µL for processing one sample. Primers sequences (with **Illumina Nextera Adaptors**) : mLCOI 5'-**GTC TCG TGG GCT CGG AGA TGT GTA TAA GAG ACA G** TAI ACY TCI GGR TGI CCR AAR AAY CA -3', jgHCOI 5'- **TCG TCG GCA GCG TCA GAT GTG TAT AAG AGA CAG** GGW ACW GGW TGA ACW GTW TAY CCY CC -3'.

| Reagent                | Quantity (µL) |
|------------------------|---------------|
| Master Mix             | 12            |
| DNAse-free sterile H2O | 12            |
| jgHCOI (10 µM)         | 2             |
| mLCOI (10 µM)          | 2             |
| DNA                    | 3             |

**Tab. S5.** DNA amplification conditions for COI. The « Denaturation », « Hybridation » and « Elongation » steps were performed 36 times.

| Step                 | Temperature (°C) | Duration       |
|----------------------|------------------|----------------|
| Initial Denaturation | 95               | 15 min.        |
| Denaturation         | 94               | 30 sec.        |
| Hybridation          | 52               | 1 min. 30 sec. |
| Elongation           | 72               | 1 min.         |
| Final Elongation     | 72               | 10 min.        |

**Tab. S6.** Relative abundance of the 10 most abundant families (%) from each body compartments in wild and stocked parrs. S.e.m. Standard error of the mean.

| Body compartment | Wild                       |          |       | Stocked                    |          |       |
|------------------|----------------------------|----------|-------|----------------------------|----------|-------|
|                  | Family                     | mean (%) | s.e.m | Family                     | mean (%) | s.e.m |
| Gut              | <i>Lactobacillaceae</i>    | 51       | 3.5   | <i>Lactobacillaceae</i>    | 32       | 3.6   |
|                  | <i>Burkholderiaceae</i>    | 13       | 1.1   | <i>Burkholderiaceae</i>    | 16       | 1.5   |
|                  | <i>Alteromonadaceae</i>    | 8.7      | 1.0   | <i>Alteromonadaceae</i>    | 12       | 1.2   |
|                  | <i>Nitrincolaceae</i>      | 8.0      | 1.0   | <i>Nitrincolaceae</i>      | 10       | 0.9   |
|                  | <i>Rhodobacteraceae</i>    | 1.4      | 0.2   | <i>Beijerinckiaceae</i>    | 3.2      | 1.2   |
|                  | <i>Flavobacteriaceae</i>   | 1.1      | 0.2   | <i>Lachnospiraceae</i>     | 2.9      | 1.2   |
|                  | <i>Xanthobacteraceae</i>   | 1.1      | 0.1   | <i>Rhodobacteraceae</i>    | 2.4      | 0.2   |
|                  | <i>Alcanivoracaceae</i>    | 0.9      | 0.1   | <i>Alcanivoracaceae</i>    | 1.4      | 0.2   |
|                  | <i>Sporichthyaceae</i>     | 0.7      | 0.6   | <i>Flavobacteriaceae</i>   | 1.2      | 0.2   |
|                  | <i>Beijerinckiaceae</i>    | 0.7      | 0.2   | <i>Ruminococcaceae</i>     | 1.1      | 0.4   |
|                  |                            |          |       |                            |          |       |
| Digesta          | <i>Lactobacillaceae</i>    | 27       | 3.3   | <i>Lactobacillaceae</i>    | 24       | 3.9   |
|                  | <i>Mycoplasmataceae</i>    | 8.4      | 1.8   | <i>Burkholderiaceae</i>    | 11       | 1.7   |
|                  | <i>Burkholderiaceae</i>    | 8.2      | 1.0   | <i>Alteromonadaceae</i>    | 8.5      | 1.2   |
|                  | <i>Erysipelotrichaceae</i> | 7.6      | 2.6   | <i>Nitrincolaceae</i>      | 7.4      | 1.0   |
|                  | <i>Alteromonadaceae</i>    | 6.9      | 1.0   | <i>Lachnospiraceae</i>     | 5.3      | 2.8   |
|                  | <i>Nitrincolaceae</i>      | 6.5      | 0.9   | <i>Mycoplasmataceae1</i>   | 4.6      | 1.6   |
|                  | <i>Beijerinckiaceae</i>    | 3.6      | 1.5   | <i>Beijerinckiaceae</i>    | 4.1      | 1.3   |
|                  | <i>Ruminococcaceae</i>     | 3.4      | 2.5   | <i>Clostridiaceae_1</i>    | 4.0      | 3.2   |
|                  | <i>Cryptosporangiaceae</i> | 2.6      | 0.3   | <i>Ruminococcaceae</i>     | 3.2      | 1.1   |
|                  | <i>Lachnospiraceae</i>     | 2.5      | 0.9   | <i>Christensenellaceae</i> | 2.9      | 1.6   |
|                  |                            |          |       |                            |          |       |
| Cutaneous mucus  | <i>Burkholderiaceae</i>    | 16       | 1.6   | <i>Burkholderiaceae</i>    | 14       | 1.3   |
|                  | <i>Alteromonadaceae</i>    | 15       | 1.4   | <i>Alteromonadaceae</i>    | 13       | 1.5   |
|                  | <i>Nitrincolaceae</i>      | 13       | 1.2   | <i>Lactobacillaceae</i>    | 12       | 2.6   |
|                  | <i>Lactobacillaceae</i>    | 6.4      | 2.1   | <i>Nitrincolaceae</i>      | 11       | 1.3   |
|                  | <i>Lachnospiraceae</i>     | 5.8      | 1.6   | <i>Lachnospiraceae</i>     | 9.0      | 1.7   |
|                  | <i>Beijerinckiaceae</i>    | 5.4      | 0.6   | <i>Beijerinckiaceae</i>    | 8.1      | 2.1   |
|                  | <i>Christensenellaceae</i> | 3.0      | 1.1   | <i>Christensenellaceae</i> | 5.7      | 1.2   |
|                  | <i>Rhodobacteraceae</i>    | 2.9      | 0.4   | <i>Ruminococcaceae</i>     | 2.6      | 0.5   |
|                  | <i>Clostridiaceae_1</i>    | 2.5      | 1.9   | <i>Rhodobacteraceae</i>    | 2.3      | 0.3   |
|                  | <i>Micrococcaceae</i>      | 2.4      | 2.2   | <i>Clostridiaceae_1</i>    | 1.7      | 1.0   |
|                  |                            |          |       |                            |          |       |
| Water            | <i>Burkholderiaceae</i>    | 27       | 1.4   |                            |          |       |
|                  | <i>Sporichthyaceae</i>     | 20       | 2.1   |                            |          |       |
|                  | <i>Chitinophagaceae</i>    | 6.7      | 1.0   |                            |          |       |
|                  | <i>Beijerinckiaceae</i>    | 5.1      | 0.5   |                            |          |       |
|                  | <i>Saccharimonadaceae</i>  | 4.4      | 3.5   |                            |          |       |
|                  | <i>Methylophilaceae</i>    | 3.8      | 0.4   |                            |          |       |
|                  | <i>Ferrovaceae</i>         | 3.2      | 0.3   |                            |          |       |
|                  | <i>Pirellulaceae</i>       | 2.9      | 0.4   |                            |          |       |
|                  | <i>Micropepsaceae</i>      | 2.7      | 0.3   |                            |          |       |
|                  | <i>Mycobacteriaceae</i>    | 2.2      | 1.4   |                            |          |       |
|                  |                            |          |       |                            |          |       |

**Tab. S7.** Mean relative abundance (%) of the 25 most abundant prey found in the stomach content of stocked and wild parrs. S.e.m. Standard error of the mean.

| Wild                                                                                                  |          |       | Stocked                                                                |          |       |
|-------------------------------------------------------------------------------------------------------|----------|-------|------------------------------------------------------------------------|----------|-------|
| Species                                                                                               | mean (%) | s.e.m | Species                                                                | mean (%) | s.e.m |
| <i>Eurylophella versimilis</i>                                                                        | 13.44    | 8.54  | <i>Ephemerella invaria</i>                                             | 12.81    | 7.45  |
| <i>Hydropsyche versimilis</i>                                                                         | 11.28    | 8.04  | <i>Tipula sp.</i>                                                      | 11.01    | 10.98 |
| <i>Promoresia versimilis</i>                                                                          | 8.99     | 8.99  | <i>Chironomidae sp.</i>                                                | 9.91     | 6.80  |
| Multiple hits: <i>Simulium truncatum</i> ,<br><i>Simulium versimilis</i>                              | 8.60     | 8.60  | <i>Lepidostoma pictile</i>                                             | 8.57     | 7.04  |
| <i>Tipula versimilis</i>                                                                              | 8.38     | 8.35  | <i>Epinotia sp.</i>                                                    | 8.05     | 8.04  |
| <i>Baetis versimilis</i>                                                                              | 7.24     | 4.53  | <i>Protoarmia porcelaria</i>                                           | 7.93     | 7.92  |
| <i>Amphigerontia versimilis</i>                                                                       | 5.50     | 5.50  | <i>Isoperla bilineata</i>                                              | 6.00     | 4.04  |
| <i>Brachycentrus versimilis</i>                                                                       | 4.41     | 4.41  | <i>Hydropsyche sparna</i>                                              | 5.56     | 5.54  |
| <i>Rhithrogena versimilis</i>                                                                         | 3.76     | 2.96  | <i>Leptophlebia sp.</i>                                                | 4.78     | 4.57  |
| Multiple hits: <i>Empididae sp.</i> ,<br><i>Neoplasta scapularis</i> ,<br><i>Empididae versimilis</i> | 3.40     | 3.40  | Multiple hits: <i>Megaselia</i><br><i>sp.</i> ,<br><i>Phoridae sp.</i> | 3.15     | 3.15  |
| <i>Bibio versimilis</i>                                                                               | 3.06     | 3.06  | <i>Optioservus sp.</i>                                                 | 2.97     | 2.97  |
| <i>Neoplasta versimilis</i>                                                                           | 3.05     | 3.05  | <i>Eurylophella versimilis</i>                                         | 2.44     | 1.99  |
| <i>Ephemerella versimilis</i>                                                                         | 2.73     | 1.15  | <i>Clastoptera obtusa</i>                                              | 2.13     | 2.10  |
| <i>Paracapnia versimilis</i>                                                                          | 2.67     | 1.69  | <i>Olophrum consimile</i>                                              | 2.07     | 2.05  |
| <i>Thienemanniella versimilis</i>                                                                     | 2.43     | 2.34  | <i>Maccaffertium vicarium</i>                                          | 1.91     | 1.89  |
| Multiple hits: <i>Empididae sp.</i> ,<br><i>Empididae versimilis</i>                                  | 1.41     | 1.41  | <i>Epinotia rectiplicana</i>                                           | 1.76     | 1.76  |
| <i>Heptagenia versimilis</i>                                                                          | 1.39     | 1.27  | <i>Thienemanniella xena</i>                                            | 1.07     | 0.84  |
| Multiple hits: <i>Hydropsyche</i><br><i>aenigma</i> ,<br><i>Hydropsyche versimilis</i>                | 1.09     | 1.09  | <i>Acerpenna pygmaea</i>                                               | 1.06     | 0.65  |
| <i>Gelis versimilis</i>                                                                               | 0.90     | 0.90  | <i>Hydroptila nr.</i>                                                  | 1.01     | 0.69  |
| <i>Attenella versimilis</i>                                                                           | 0.65     | 0.46  | <i>Phoridae sp.</i>                                                    | 0.74     | 0.74  |
| <i>Hydroptila versimilis</i>                                                                          | 0.65     | 0.37  | <i>Agapetus pinatus</i>                                                | 0.63     | 0.63  |
| <i>Acerpenna versimilis</i>                                                                           | 0.64     | 0.49  | <i>Pasiphaea multidentata</i>                                          | 0.44     | 0.44  |
| <i>Maccaffertium versimilis</i>                                                                       | 0.56     | 0.52  | <i>Isoperla cotta</i>                                                  | 0.42     | 0.40  |
| <i>Leucrocota versimilis</i>                                                                          | 0.54     | 0.53  | <i>Hydropsyche slossonae</i>                                           | 0.40     | 0.40  |
| <i>Chironomidae versimilis</i>                                                                        | 0.52     | 0.49  | <i>Platypeza sp.</i>                                                   | 0.39     | 0.39  |

**Tab. S8.** Primer sequence for genetic assignation.

Informations sur les loci utilisés pour la caractérisation génétique. L'astérisque (\*) indique l'amorce à laquelle est fixée la molécule fluorescente

| Locis    | Primer sequence (5'-3')                                           | Binding temperature (°C) | Reference                 |
|----------|-------------------------------------------------------------------|--------------------------|---------------------------|
| Ssa85    | F : AGGTGGGTCTCCAAGCTAC<br>R : ACCCGCTCCTCACTTAATC*               | 58                       | (Oreilly et al., 1996)    |
| Ssa171   | F : TTATTATCCAAAGGGGTCAAAA<br>R : GAGGTCGCTGGGGTTTACTAT*          | 58                       | (Oreilly et al., 1996)    |
| Ssa197   | F : GGGTTGAGTAGGGAGGCTTG<br>R : TGGCAGGGATTTGACATAAC*             | 58                       | (Oreilly et al., 1996)    |
| Ssa202   | F : CTTGGAATATCTAGAATATGGC<br>R : TTCATGTGTTAATGTTGCGTG*          | 58                       | (Oreilly et al., 1996)    |
| SsaD58   | F : TAGAGTTTGTCTCTGGCTTTG*<br>R : AGACCCTAGGACTGGCTACTG           | 58                       | (King et al., 2005)       |
| SsaD71   | F : AACGTGAAACATAAATCGATGG*<br>R : TAAGAATGGGTTGCCTATGAG          | 58                       | (King et al., 2005)       |
| SsaD85   | F : CTTTGGCTGTTTCAGGTATGAC*<br>R : CACTGCTCTACAACAGAAGTCTC        | 58                       | (King, comm. pers.)       |
| SsaD144  | F : TTGTGAAGGGGCTGACTAAC*<br>R : TCAATTGTTGGGTGCACATAG            | 58                       | (King et al., 2005)       |
| SsaD486  | F : TCGCTGTGTATCAGTATTTTGG*<br>R : ACTCGGATAACACTCACAGGTC         | 58                       | (King et al., 2005)       |
| Ssosl417 | F : TTGTTCAAGTGTATATGTGTCCCAT*<br>R : GATCTTCACTGCCACCTTATGACC    | 58                       | (Slettan et al., 1995)    |
| SsspG7   | F : CTTGGTCCCGTTCTTACGACAACC*<br>R : TGCACGCTGCTTGGTCCTTG         | 58                       | (Paterson et al., 2004)   |
| Sssp1605 | F : CGCAATGGAAGTCAGTGGAAGTGG*<br>R : CTGATTTAGCTTTTTAGTGCCCAATGC  | 58                       | (Paterson et al., 2004)   |
| Sssp2201 | F : TTTAGATGGTGGGATACTGGGAGGC*<br>R : CGGGAGCCCCATAACCCTACTAATAAC | 58                       | (Paterson et al., 2004)   |
| Sssp2210 | F : AAGTATTCATGCACACACATTCAGTGC*<br>R : CAAGACCCTTTTTCCAATGGGATTC | 58                       | (Paterson et al., 2004)   |
| Sssp2215 | F : ACTAGCCAGGTGTCCTGCCGGTC*<br>R : AGGGTCAGTCAGTCACACCATGCAC     | 58                       | (Paterson et al., 2004)   |
| Sssp2216 | F : GGGCCAGACAGATAAACAAACACGC*<br>R : GCCAACAGCAGCATCTACACCCAG    | 58                       | (Paterson et al., 2004)   |
| MST-3    | F : CCCTGGTTTGACTTTGTCTCA*<br>R : AGGCACTCTCACCAGCTAAAGATG        | 58                       | (Presa et Guyomard, 1996) |

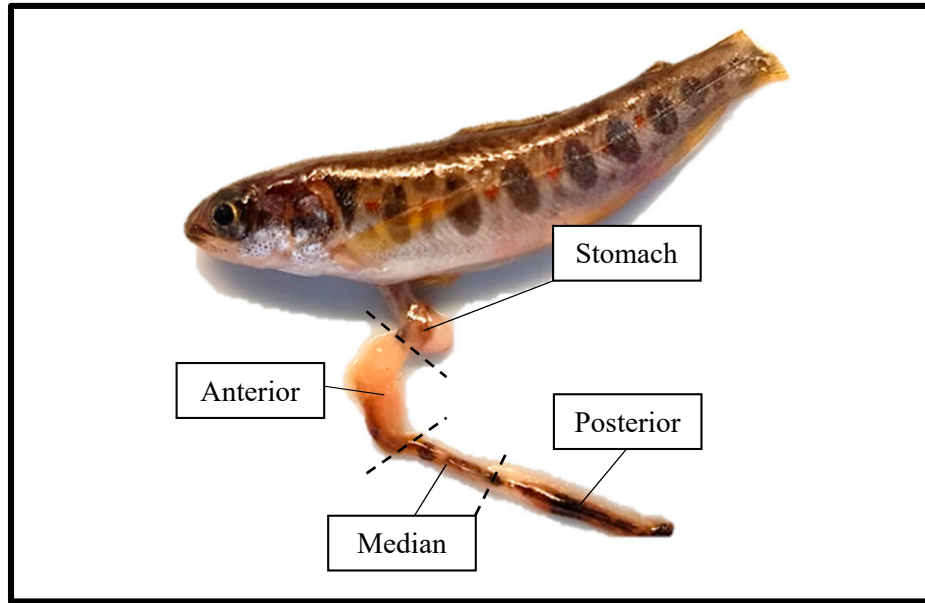

**Fig S1.** Body compartments and gut segments that were separated for the microbiota analysis of the intestinal tract.

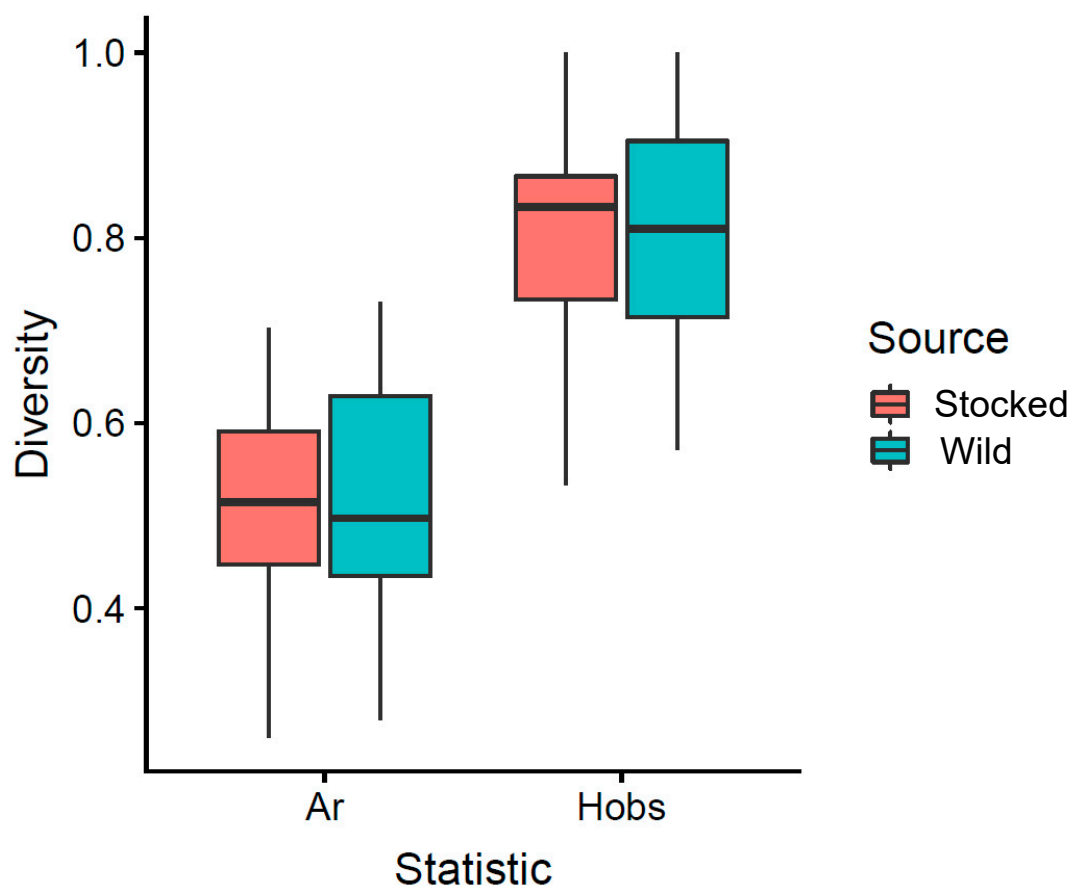

**Fig S2.** Genetic diversity for stocked and wild parrs calculated with individuals from year 2016 and 2017. Ar ; Allelic richness, Hobs ; Observed heterozygosity.



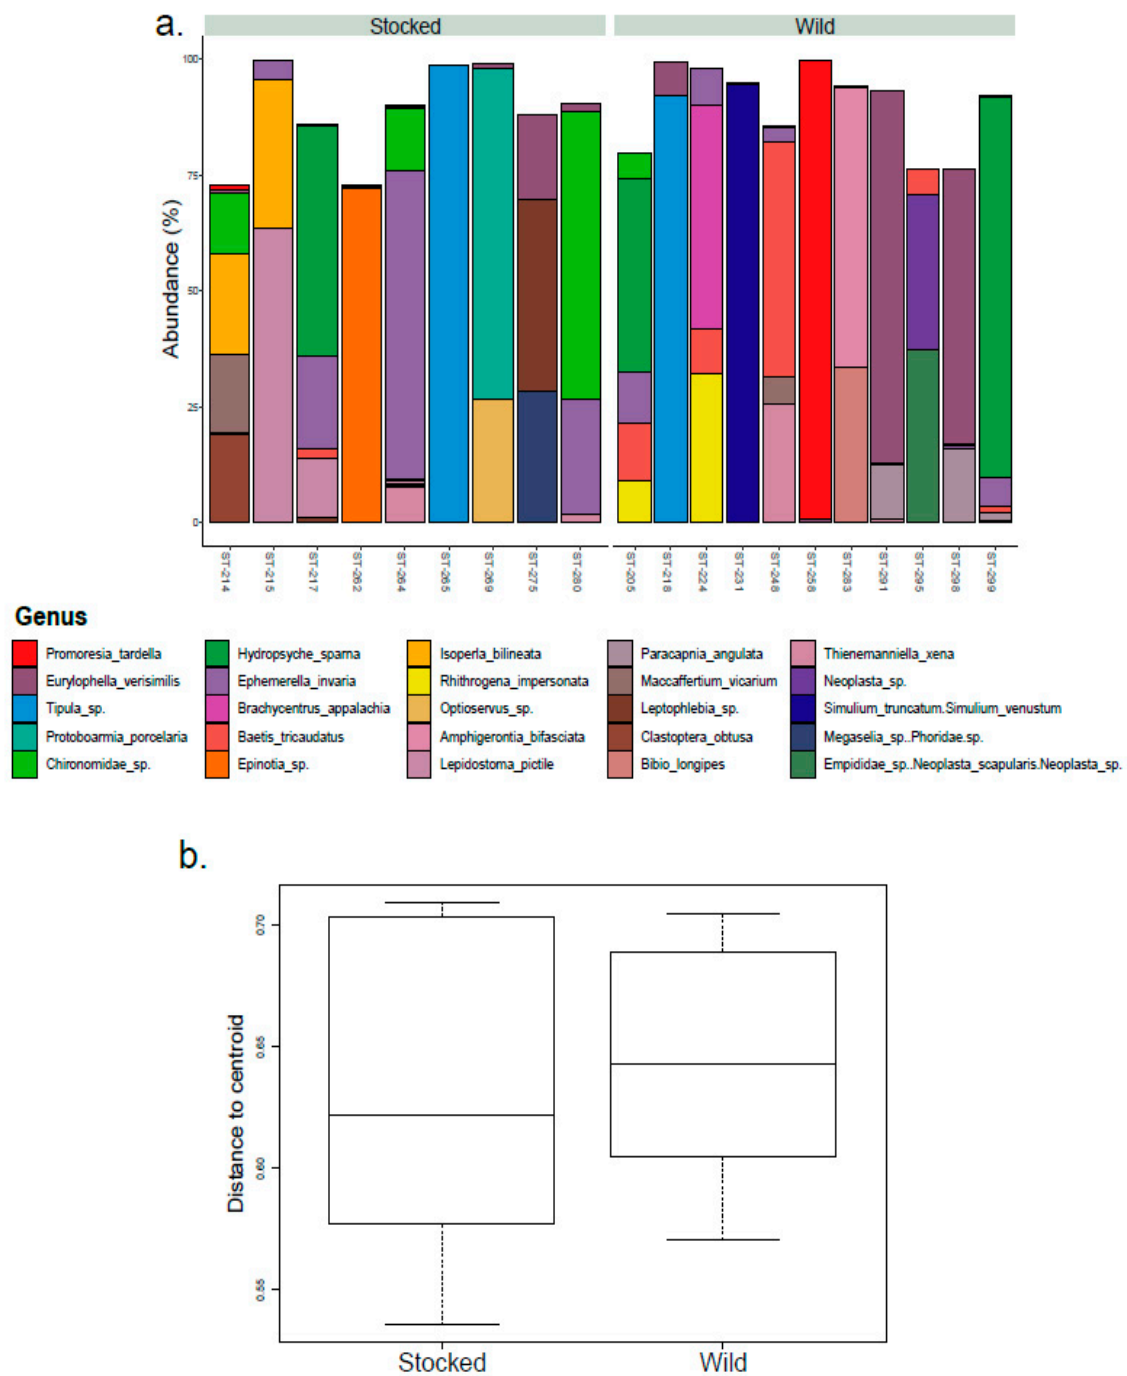

**Fig. S3.** The 25 most abundant eukaryotic species identified by the amplification of the biomarker Cytochrome Oxidase I (COI) from stocked and wild parrish stomach contents (**a**) highlight a high interindividual variability between both groups (**b**). The boxplot represents the distance to the centroid of the Bray Curtis distances within each group, based on an analysis of the multivariate homogeneity of dispersion (variances) of samples.

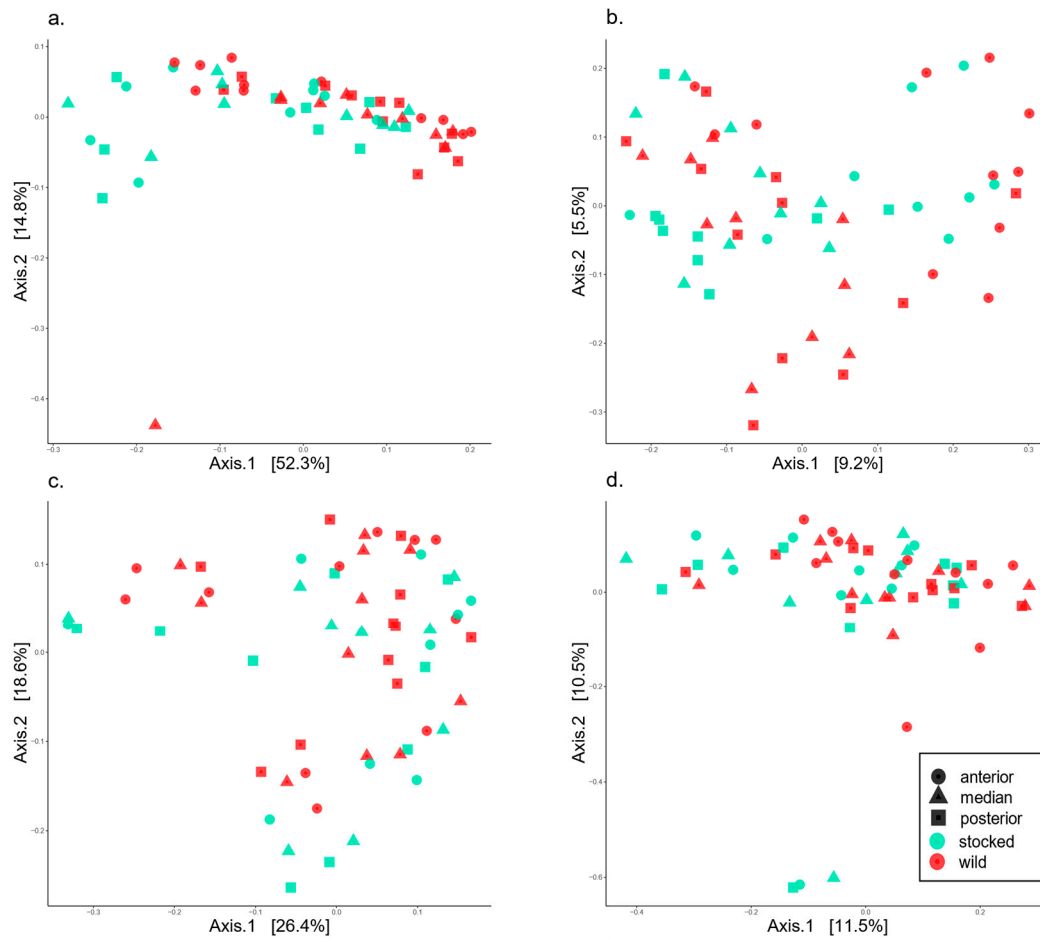

**Fig. S4.** Principal Coordinates Analysis (PCoA) highlights distinct patterns of microbial community structure of gut and digesta samples for weighted (a, c) or unweighted (b, d) UniFrac distances. **a.** and **b.** show PCoA from weighted (**a**) and unweighted (**b**) UniFrac distances from gut samples, where bacterial community composition calculated with weighted UniFrac (**a**) is significantly different between stocked and wild parrs ( $F = 5.8617$ ,  $p = 0.003$ ), indicating that abundance of shared bacteria significantly differs. **c.** and **d.** show PCoA from weighted (**c**) and unweighted (**d**) UniFrac distances from digesta samples, where bacterial community composition calculated with unweighted UniFrac (**d**) is significantly different between stocked and wild parrs ( $F = 1.8704$ ,  $p = 0.002$ ), indicating that digesta community differ by the presence/absence of bacterial strains.
